# Supplementary material for: Benchmarking common quantification strategies for large-scale phosphoproteomics
Source: PubMed Central journal article supplement (PMC5849679; doi:10.1038/s41467-018-03309-6), 2018-03-13
Supplement: 41467_2018_3309_MOESM3_ESM.pdf [file 41467_2018_3309_MOESM3_ESM.pdf]

## Description of Additional Supplementary Files

File Name: Supplementary Data 1

Description: **R code for phosphorylation stoichiometry calculation via 3DMM.** This R script file contains the R code needed to perform the 3DMM phosphorylation stoichiometry calculation for Fig. 6.

File Name: Supplementary Data 2

Description: **Example data for 3DMM in Fig. 6.** This compressed file contains the modification-specific peptides.txt output from MaxQuant and the HumanAndYeastProtIdentifiers.txt to differentiate between human and yeast proteins, both of which are needed to recreate the analysis in Fig. 6 with the R code in Supplementary Data 1.

File Name: Supplementary Data 3

Description: **Overview of MS raw files and MaxQuant configuration settings.** This xlsx-file features an overview of all MS raw files, their association with the Figures and MaxQuant configuration settings.

File Name: Supplementary Data 4

Description: **Tools for signal-to-noise extraction in Fig. 1.** This Perl script file contains the code to read out TMT reporter ion signal-to-noise ratios from raw data after processing using raxport.exe.

File Name: Supplementary Data 5

Description: **Biological benchmark phosphorylation site intensities and SAM regulation.** This xlsx-file features all intensities and SAM-test statistics of the biological benchmark dataset in Fig. 3.

File Name: Supplementary Data 6

Description: **Kinase motif and GO-term enrichment data.** This xlsx-file features all enriched kinase motifs and GO-terms from Fig. 4 and Supplementary Fig. 4/6.
